# Supplementary material for: Germline-Specific Repetitive Elements in Programmatically Eliminated Chromosomes of the Sea Lamprey (Petromyzon marinus)
Source: MDPI journal article supplement (doi:10.3390/genes10100832), 2019-10-22
Supplement: s1 [file s1]

Figure S4

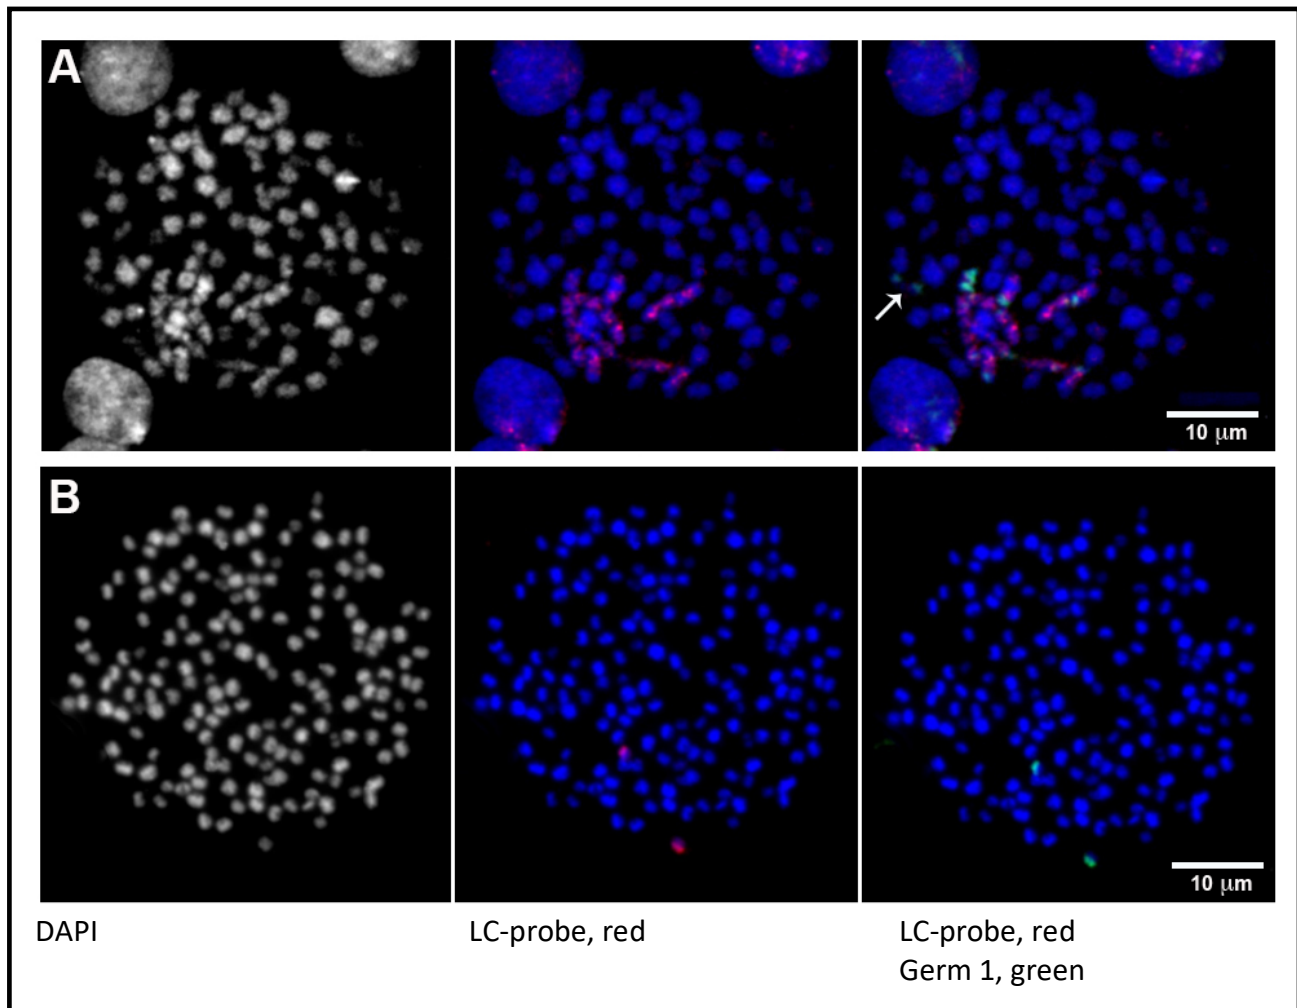

**Figure S4. FISH of a probe generated from laser capture of lagging chromatin (red) and *Germ1*-repeat (green) on meiotic (germline) and mitotic (somatic) chromosomes from somatic line. (A) Hybridization to meiotic chromosomes from testes. The arrow on panel A indicates bivalent that corresponds somatically retained *Germ1* enriched chromosome visible in somatic spreads. (B) A somatic metaphase spread contains one pair of chromosomes which shows hybridization both for LC probe and *Germ1*.**
