# Supplementary material for: Germline-Specific Repetitive Elements in Programmatically Eliminated Chromosomes of the Sea Lamprey (Petromyzon marinus)
Source: MDPI journal article supplement (doi:10.3390/genes10100832), 2019-10-22
Supplement: s1 [file s1]

Figure S5

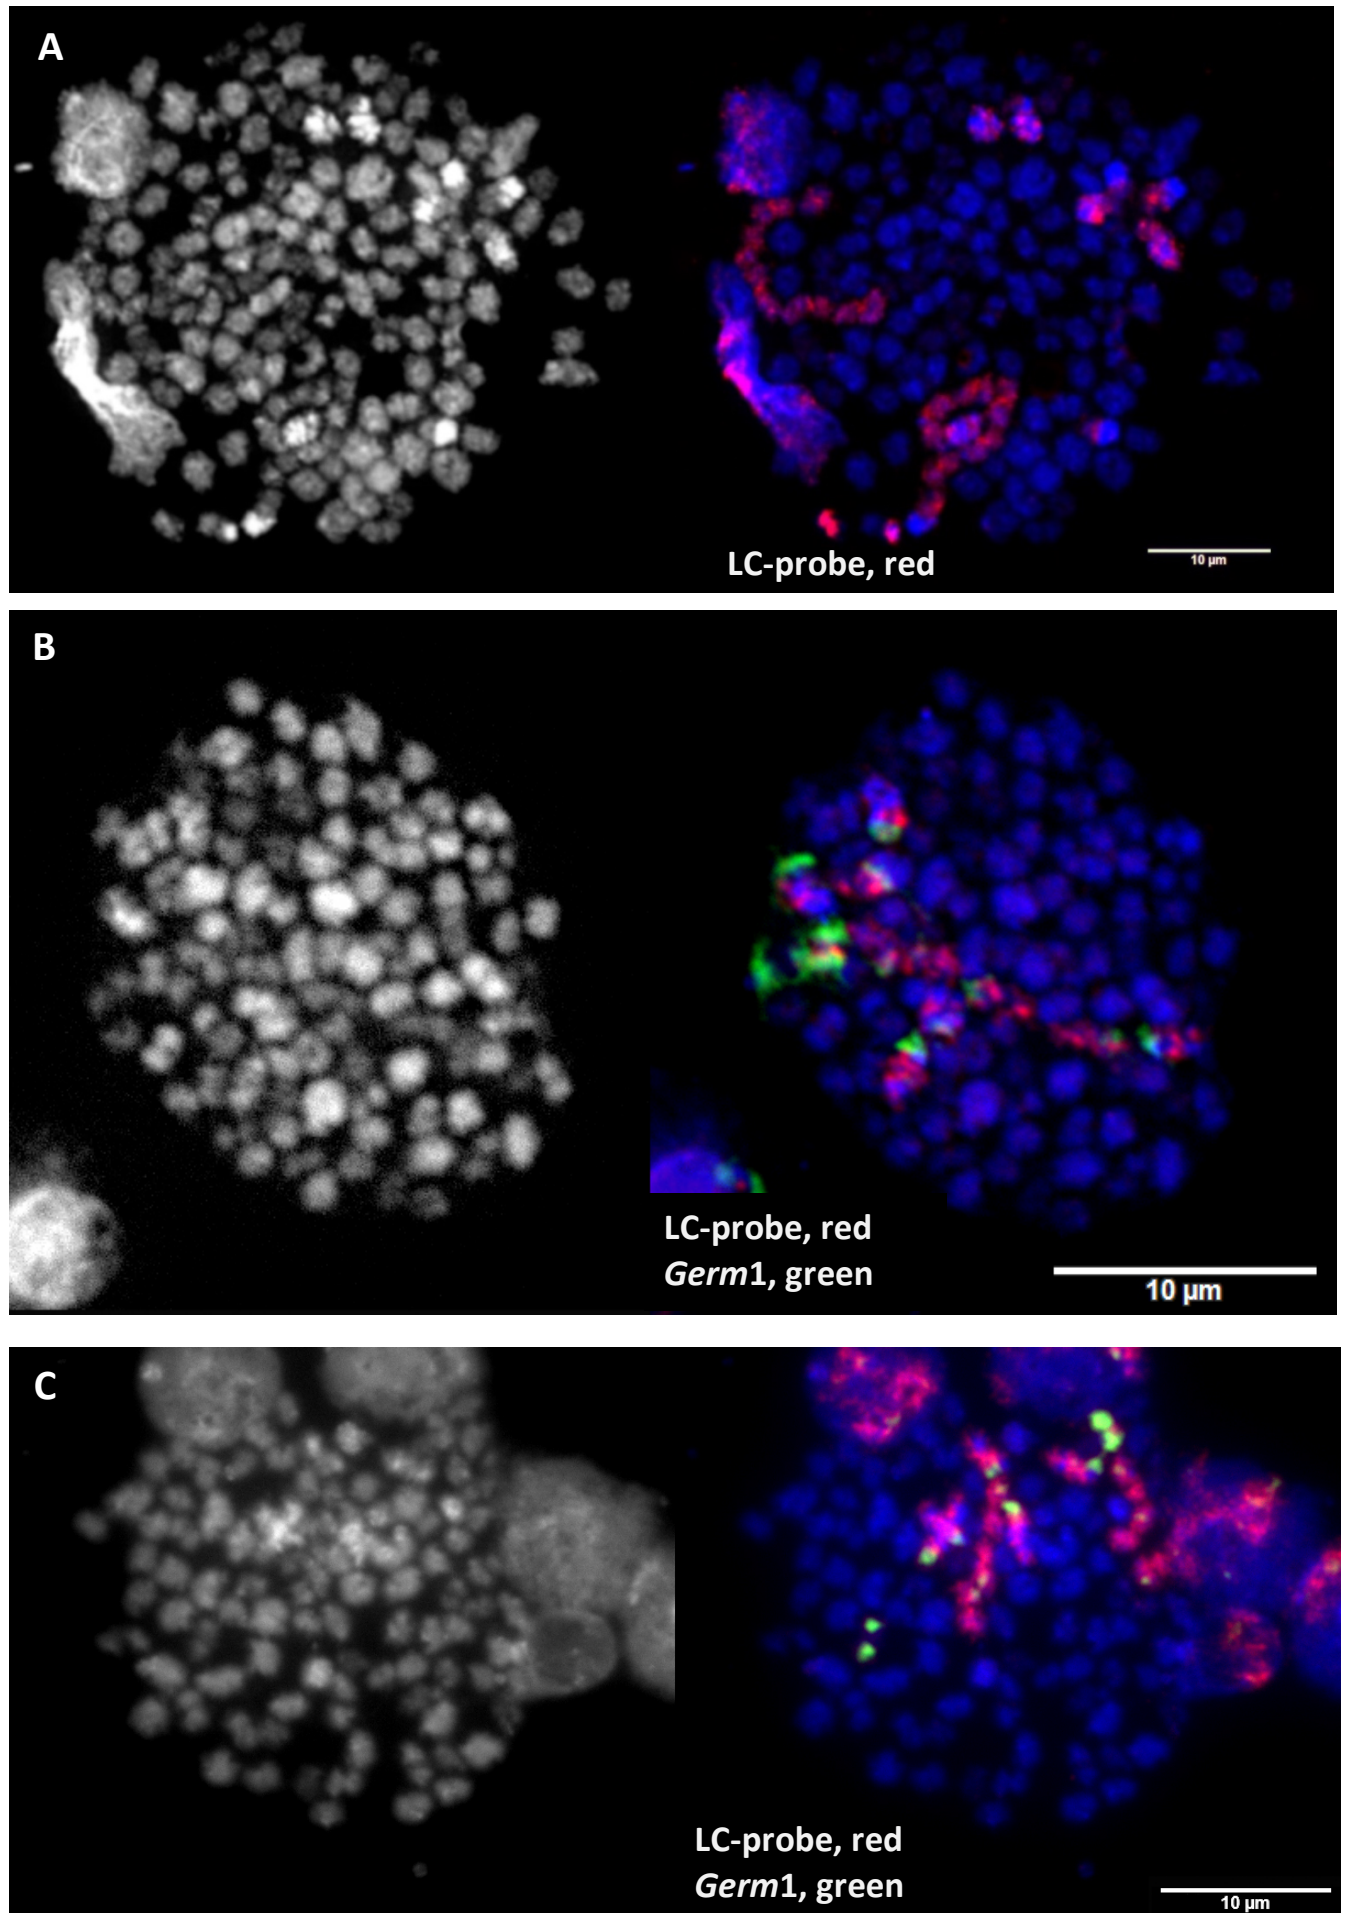

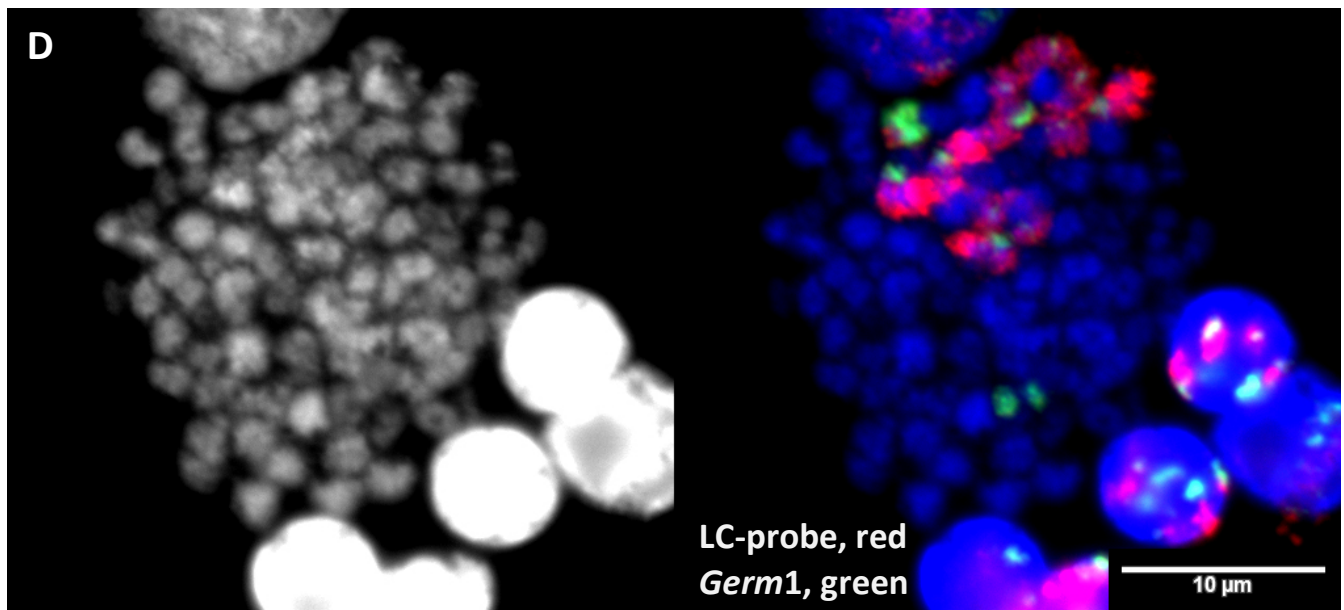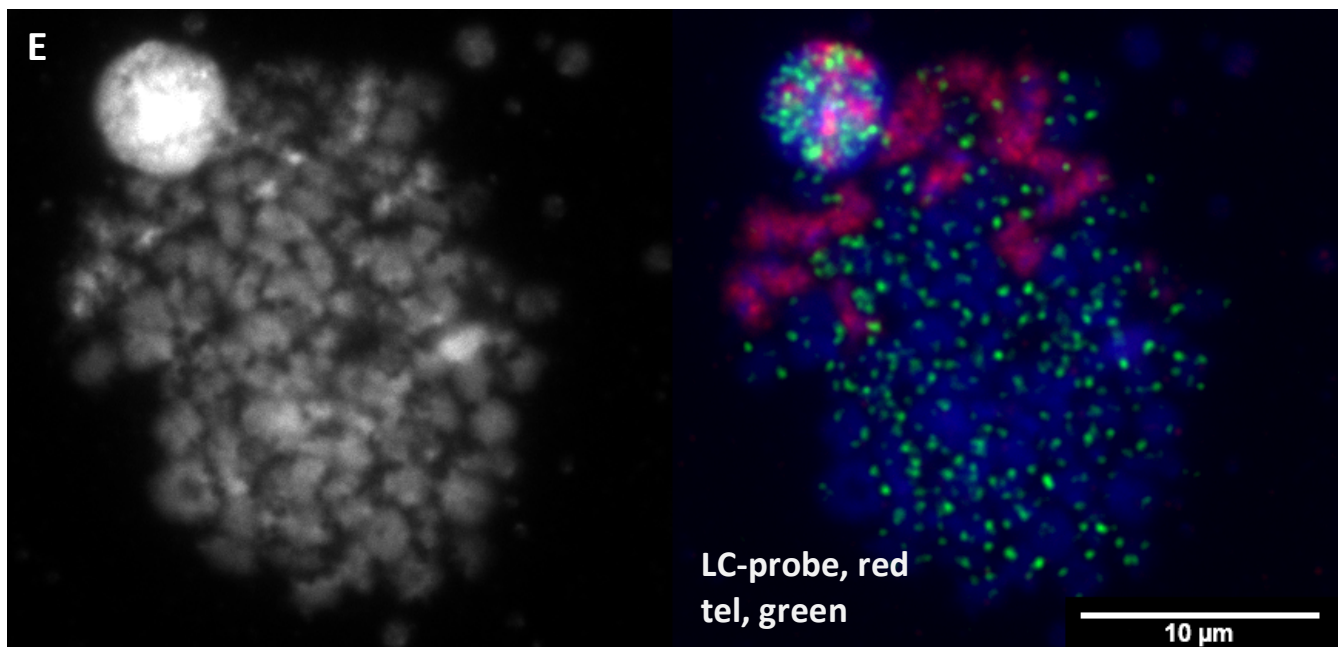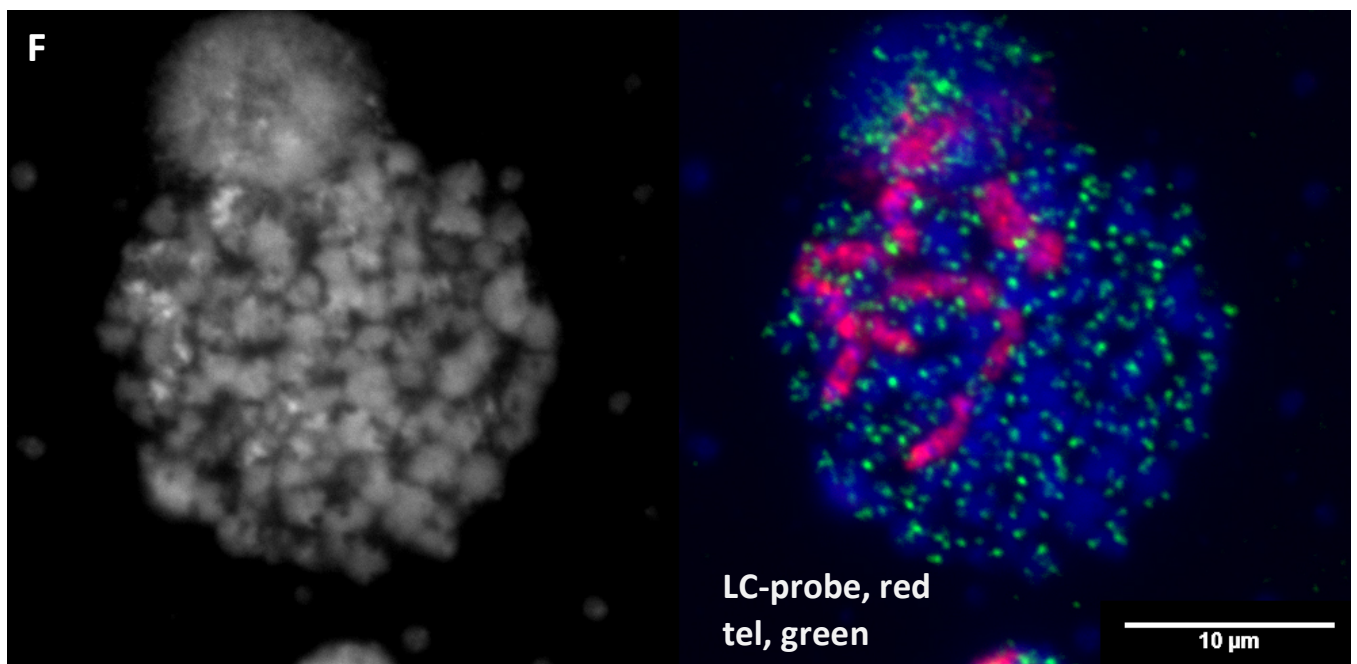



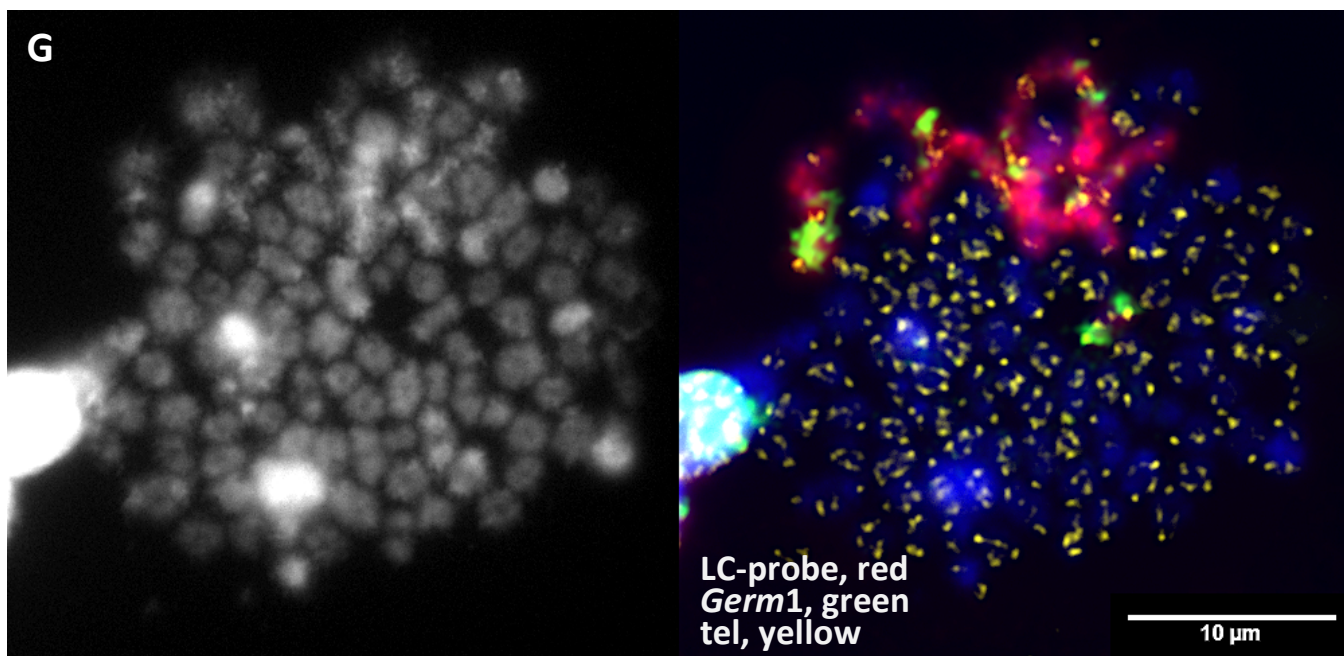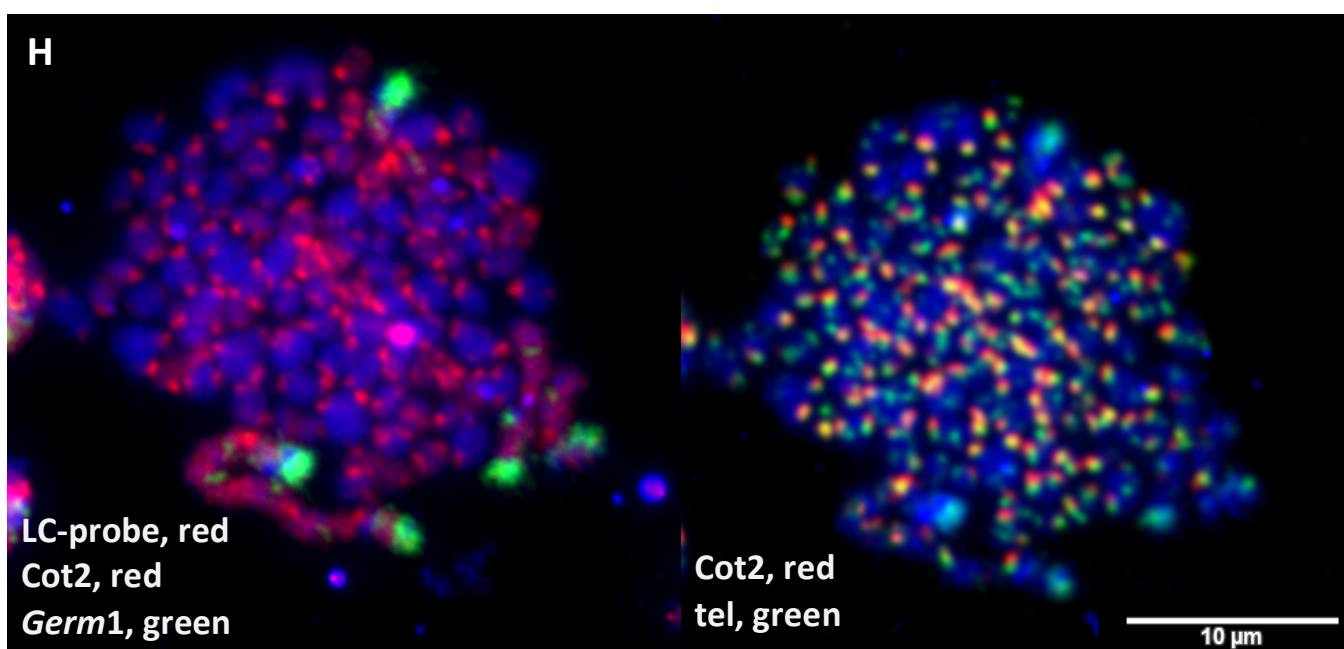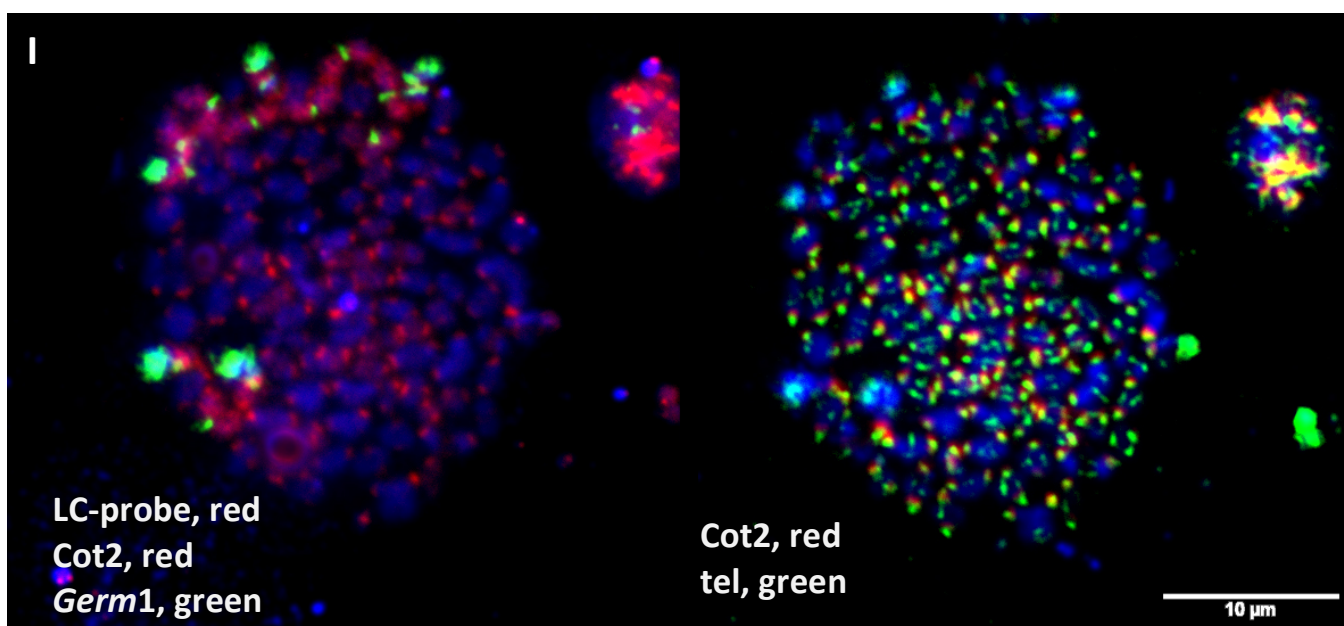

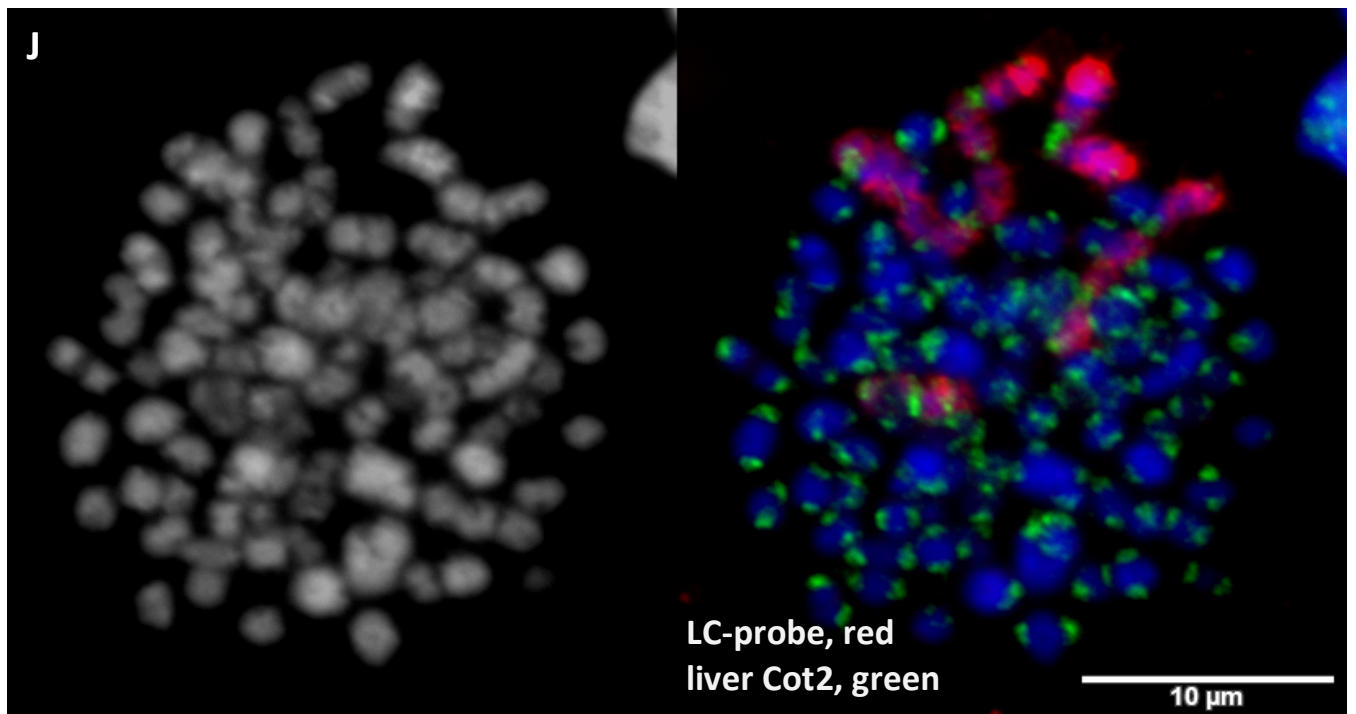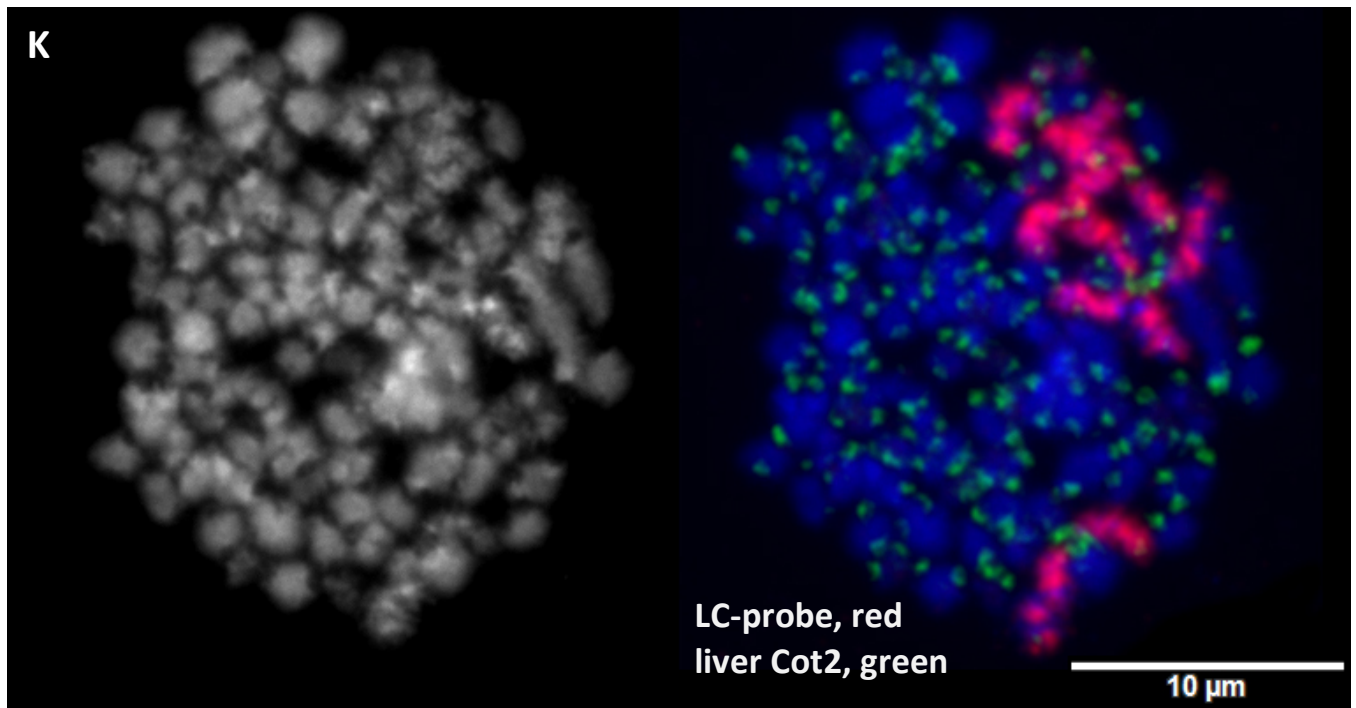

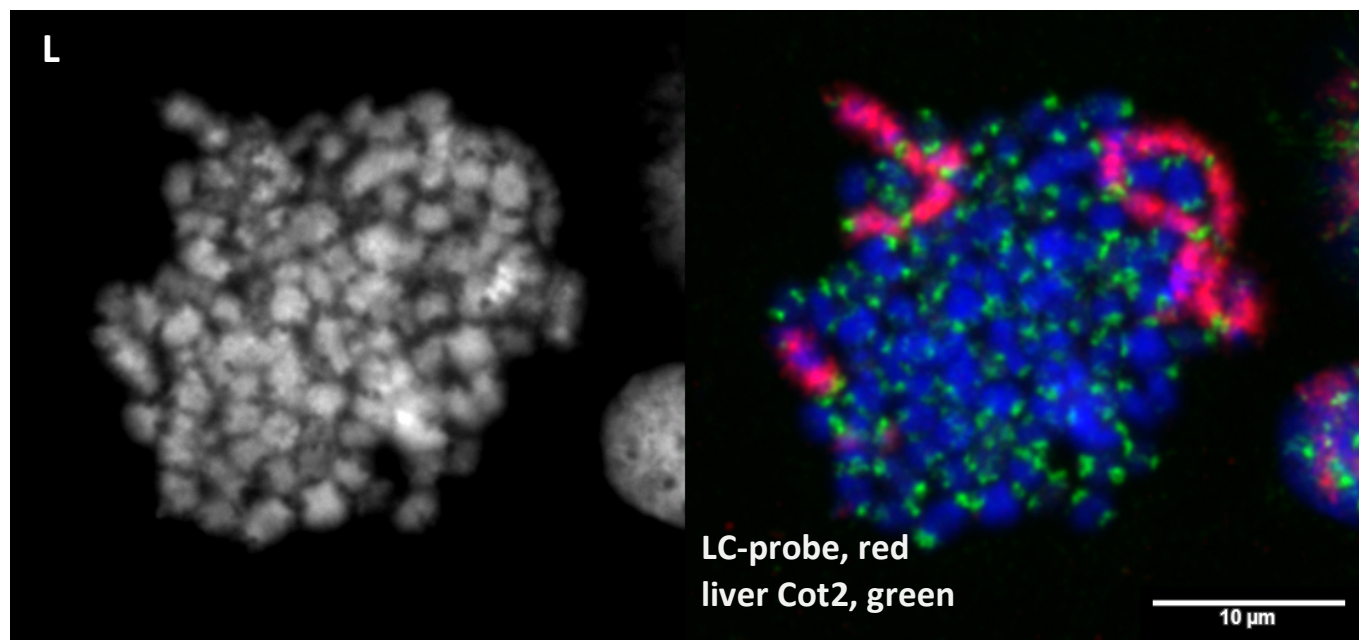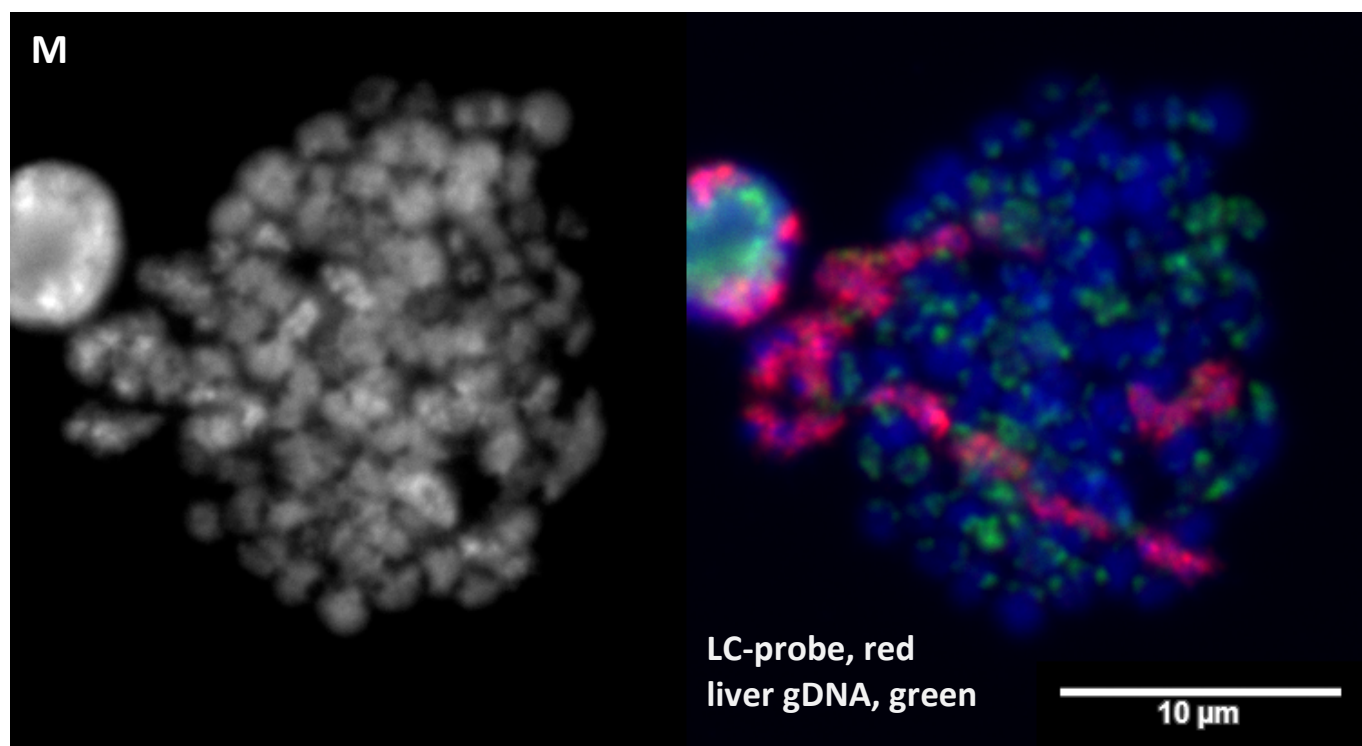



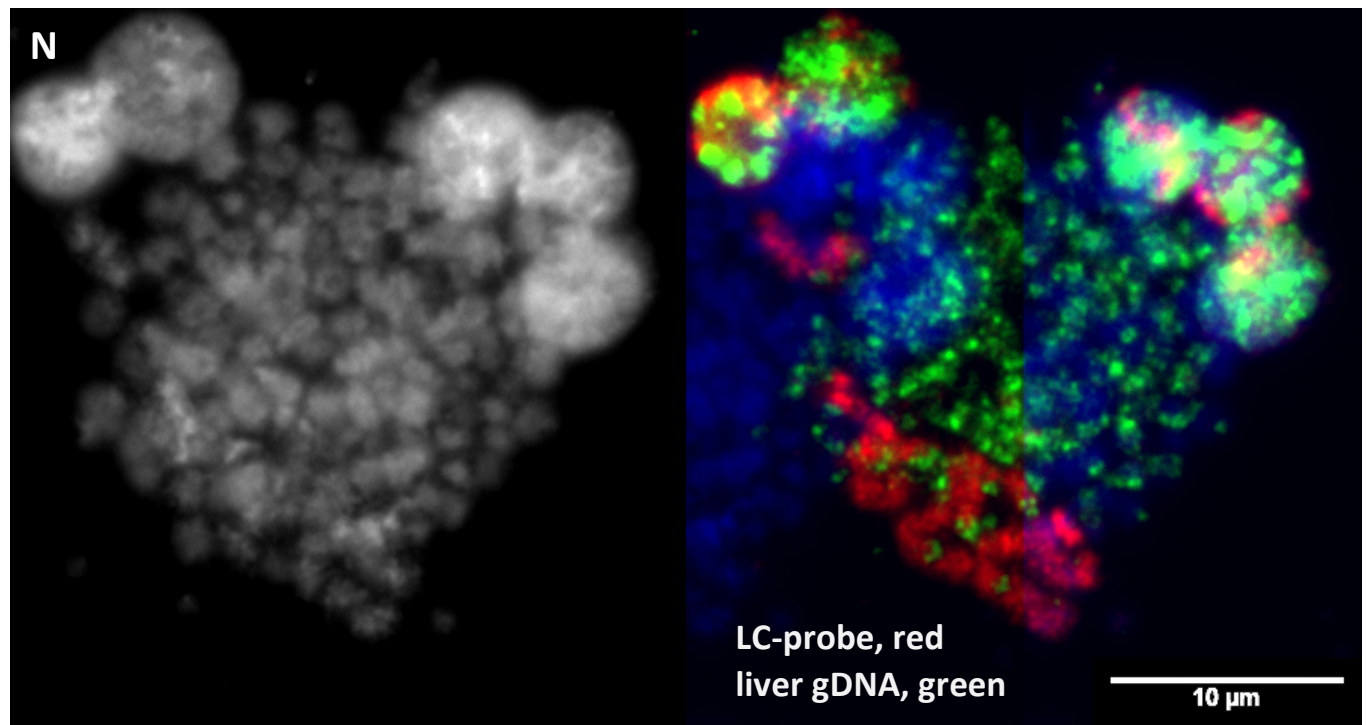

**Figure S5. Meiotic chained multivalents in the sea lamprey spermatid metaphase spreads.** Meiotic chains in the sea lamprey metaphase I spreads (MI) hybridized with the LC probe in combination with various other probes. (A) LC probe only (red); (B – D) LC (red) and *Germ1* (green); (E, F) LC (red), telomere PNA probe (green); (G) LC (red), *Germ1* (green), telomere PNA probe (yellow); (H, I) left: LC (red), testes C<sub>0</sub>t2 (red), *Germ1* (green); right: testes C<sub>0</sub>t2 (red), telomere PNA probe (green); (J-L) LC (red), liver C<sub>0</sub>t2 (green); (M, N) LC (red), genomic liver (green).
