# Supplementary material for: Germline-Specific Repetitive Elements in Programmatically Eliminated Chromosomes of the Sea Lamprey (Petromyzon marinus)
Source: MDPI journal article supplement (doi:10.3390/genes10100832), 2019-10-22
Supplement: s1 [file s1]

Figure S3

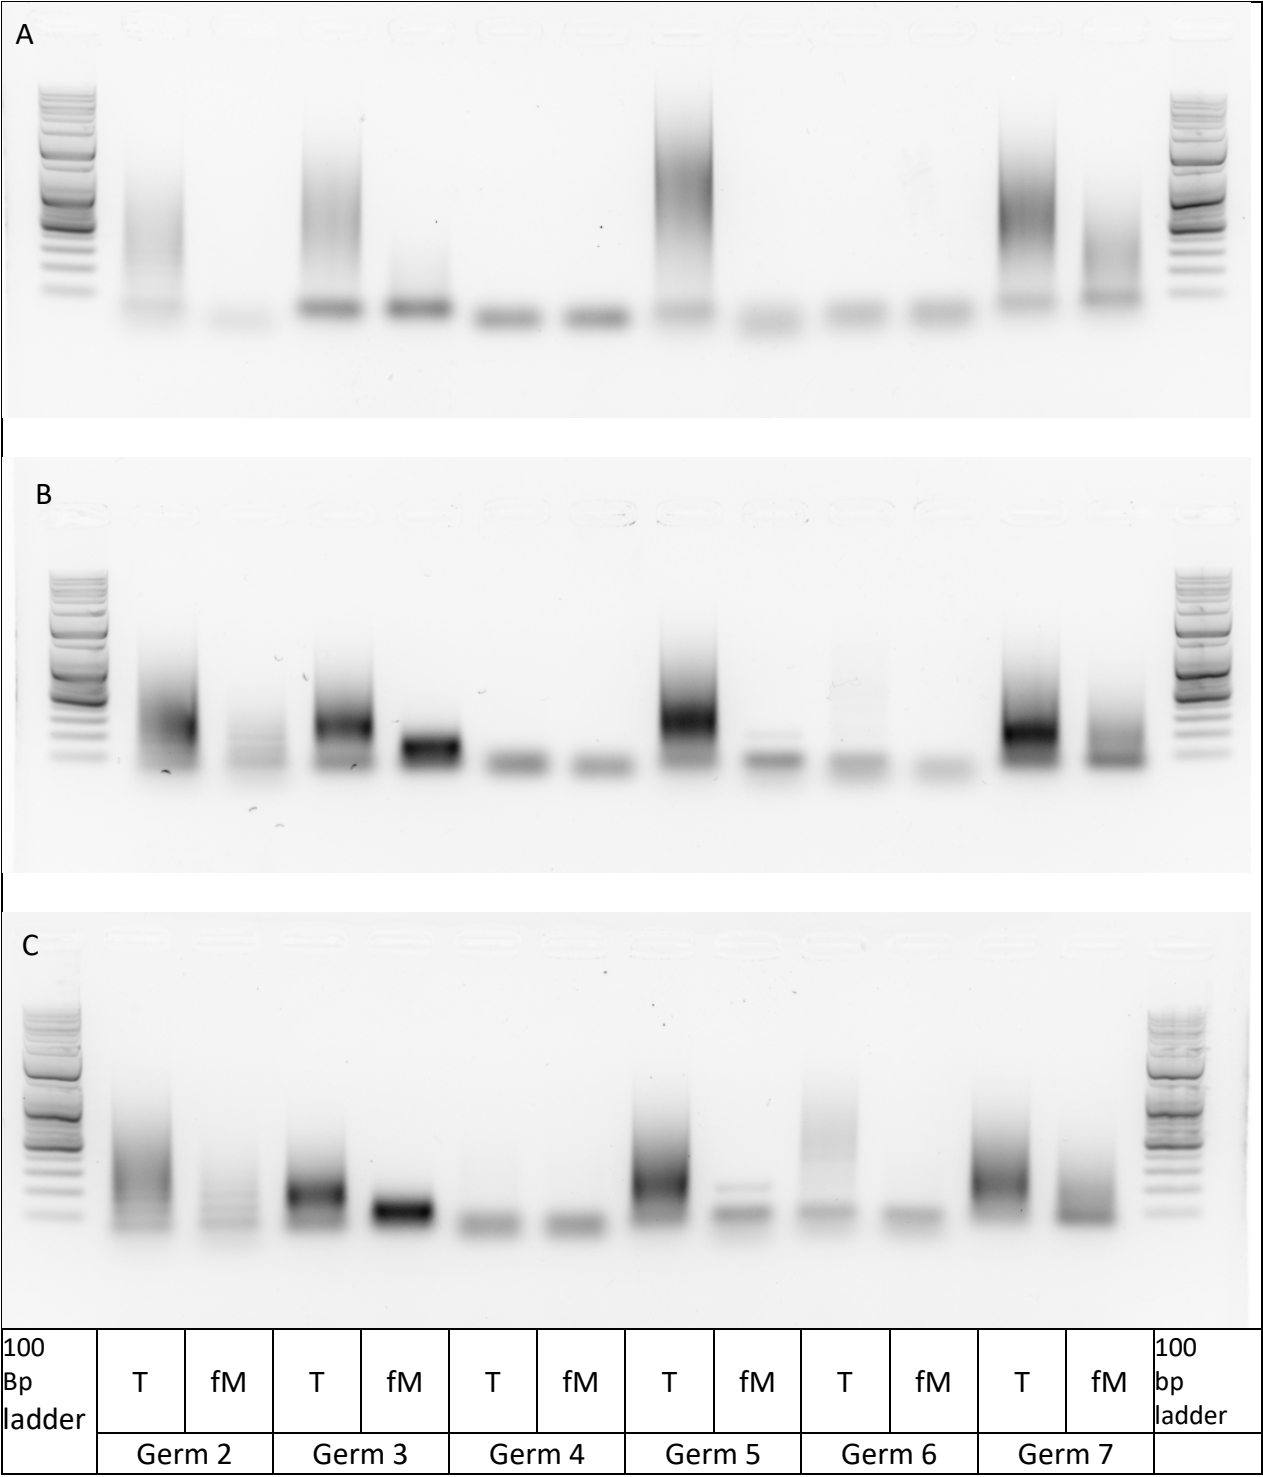

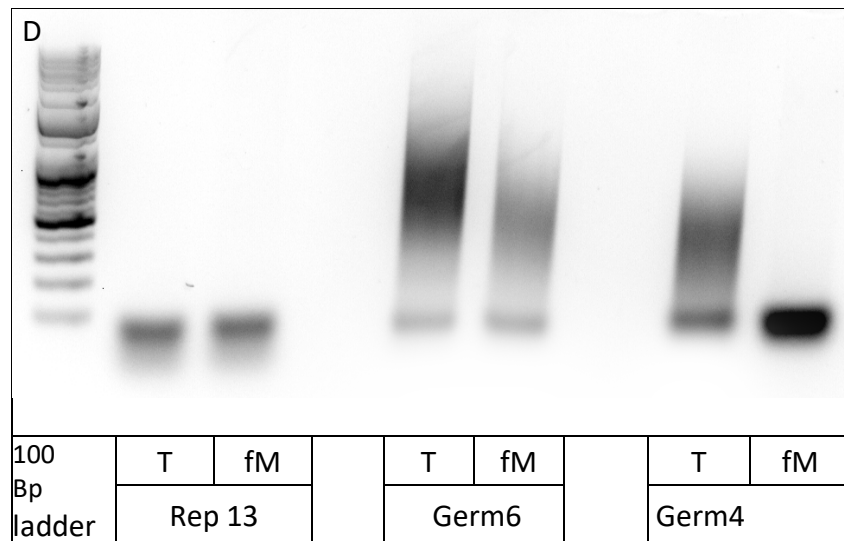

**Figure S3. Validation of germline enriched repeats via PCR.** DNA extracted from testes ‘T’ was used as a germline sample, and DNA extracted from female muscle tissue as a somatic sample with reduced potential for germline contamination ‘fM’ [69]. Panels A-D show different levels of specificity of PCR reactions depending on the primer annealing temperature: (A) 65 °C, (B) 60 °C, (C) 55 °C, (D) An additional 50 °C PCR gel was run for repeat13 (not used in further analysis), *Germ6*, and *Germ4*.
