# Supplementary material for: Germline-Specific Repetitive Elements in Programmatically Eliminated Chromosomes of the Sea Lamprey (Petromyzon marinus)
Source: MDPI journal article supplement (doi:10.3390/genes10100832), 2019-10-22
Supplement: s1 [file s1]

Figure S1

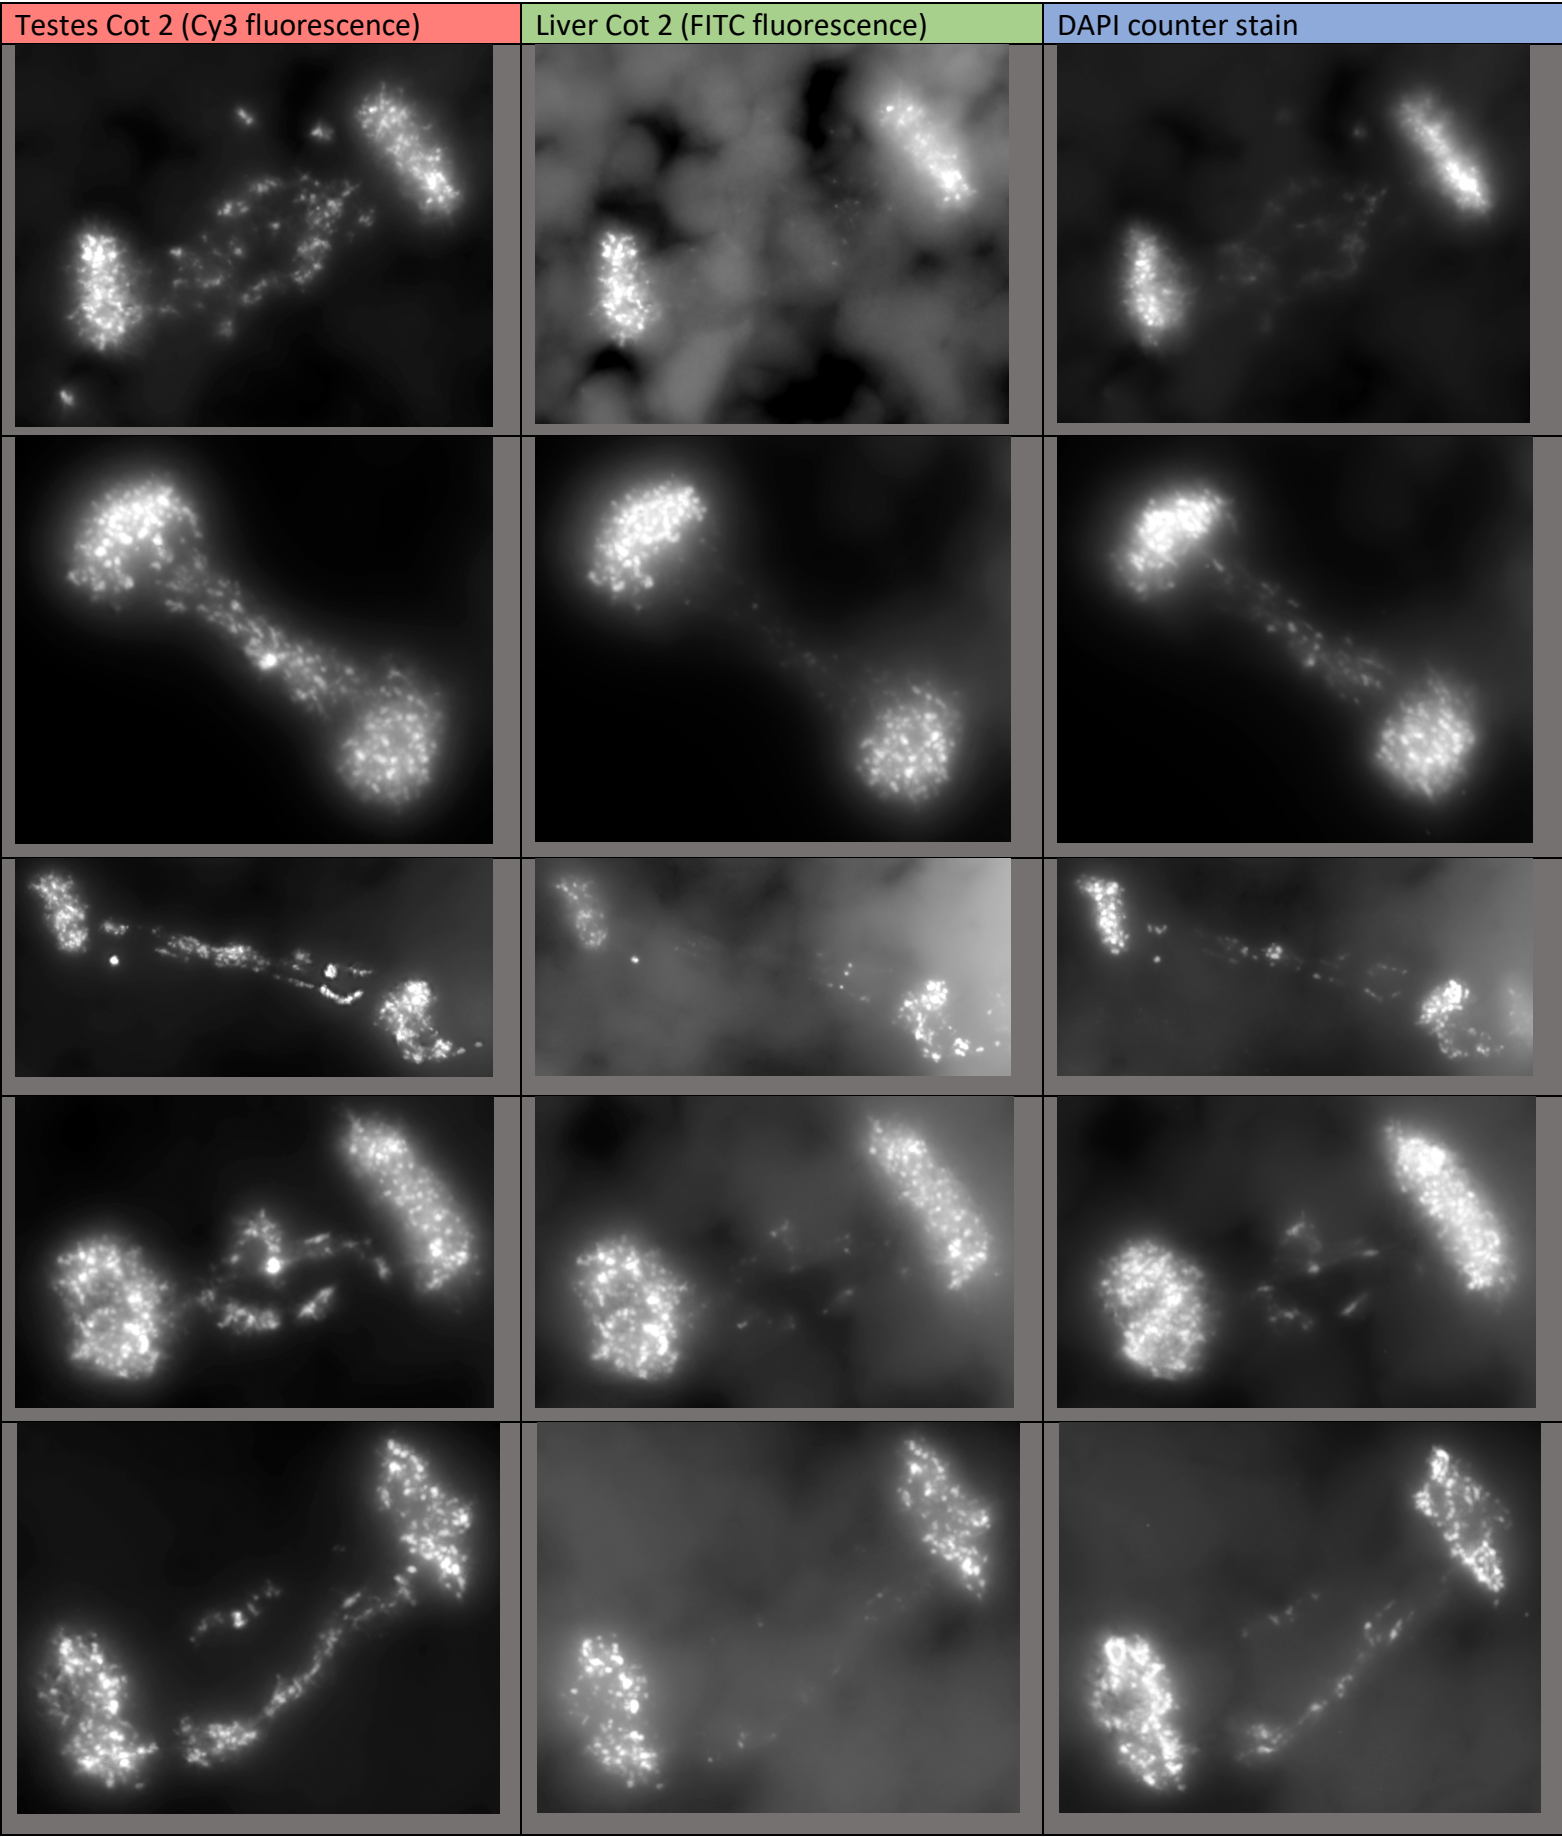

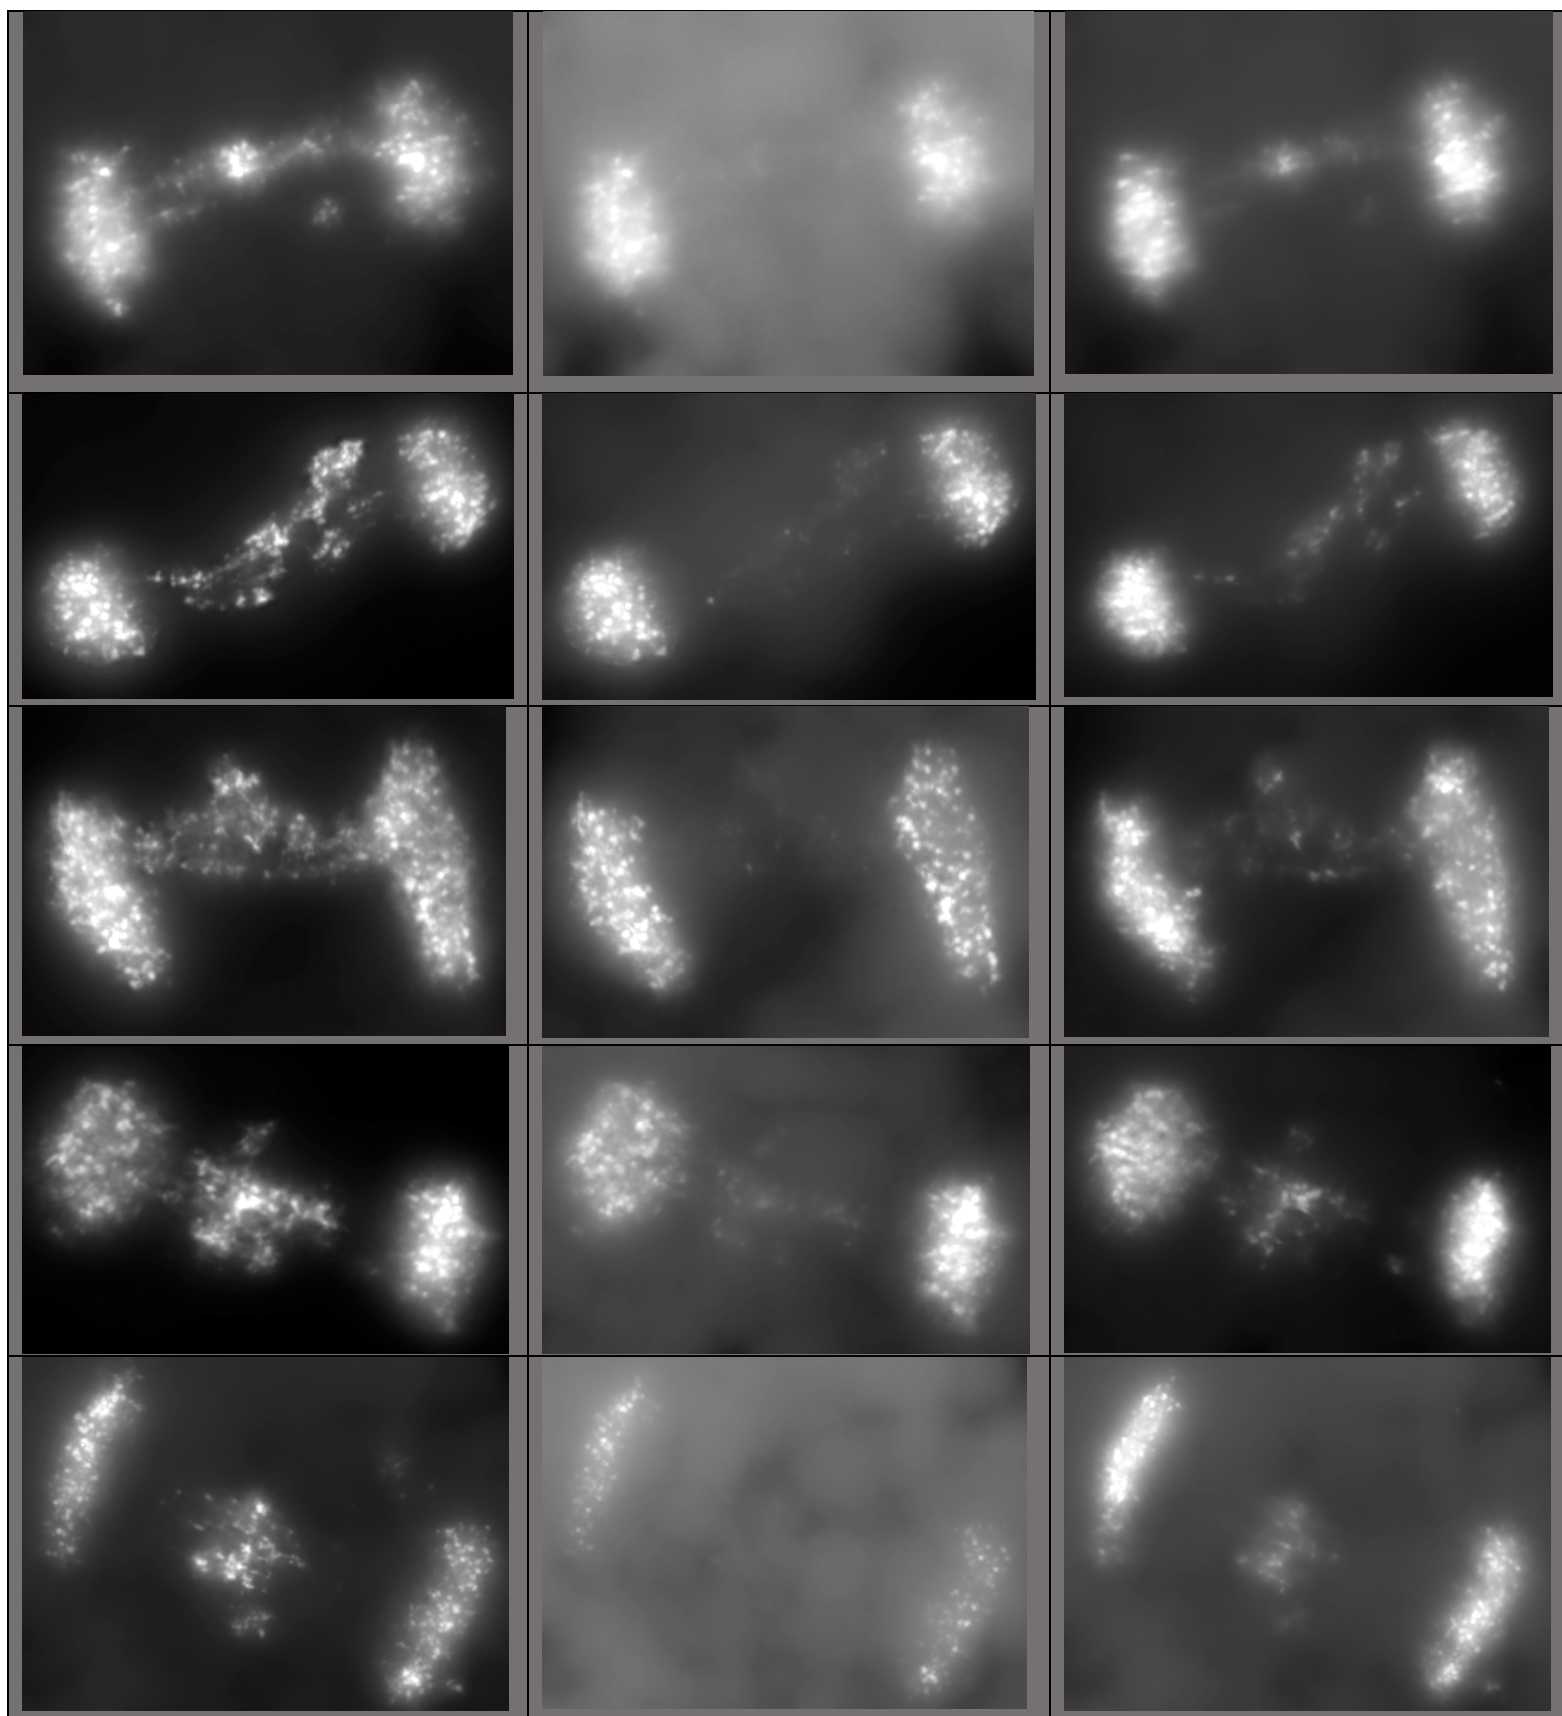

**Figure S1. C<sub>0</sub>t CGH on anaphase chromosomes of the sea lamprey embryos undergoing germline chromosome elimination.** Germline repetitive DNA (C<sub>0</sub>t2 isolated from testes) labels lagging chromosomes with equal or greater intensity in comparison to somatically retained chromosomes, whereas the fluorescence produced by a liver C<sub>0</sub>t2 DNA probe is almost completely absent from lagging chromosomes but well represented in somatically retained chromosomes. Germline derived C<sub>0</sub>t2-DNA labeled with Cy3 and somatic repetitive fraction labeled with FITC are shown in gray monochrome scale for better contrast.
